# Validation of Expression Patterns for Nine miRNAs in 204 Lymph-Node Negative Breast Cancers

Kristin Jonsdottir<sup>1</sup>, Susanne R. Janssen<sup>2</sup>, Fabiana C. Da Rosa<sup>1</sup>, Einar Gudlaugsson<sup>1</sup>, Ivar Skaland<sup>1</sup>, Jan P. A. Baak<sup>1,2</sup>, Emiel A. M. Janssen<sup>1\*</sup>

<sup>1</sup> Department of Pathology, Stavanger University Hospital, Stavanger, Norway, <sup>2</sup> Free University, Amsterdam, The Netherlands

## Abstract

**Introduction:** Although lymph node negative (LN-) breast cancer patients have a good 10-years survival (~85%), most of them still receive adjuvant therapy, while only some benefit from this. More accurate prognostication of LN- breast cancer patient may reduce over- and under-treatment. Until now proliferation is the strongest prognostic factor for LN- breast cancer patients. The small molecule microRNA (miRNA) has opened a new window for prognostic markers, therapeutic targets and/or therapeutic components. Previously it has been shown that miR-18a/b, miR-25, miR-29c and miR-106b correlate to high proliferation.

**Methods:** The current study validates nine miRNAs (miR-18a/b, miR-25, miR-29c, miR-106b, miR-375, miR-424, miR-505 and let-7b) significantly correlated with established prognostic breast cancer biomarkers. Total RNA was isolated from 204 formaldehyde-fixed paraffin embedded (FFPE) LN- breast cancers and analyzed with quantitative real-time Polymerase Chain Reaction (qPCR). Independent T-test was used to detect significant correlation between miRNA expression level and the different clinicopathological features for breast cancer.

**Results:** Strong and significant associations were observed for high expression of miR-18a/b, miR-106b, miR-25 and miR-505 to high proliferation, oestrogen receptor negativity and cytokeratin 5/6 positivity. High expression of let-7b, miR-29c and miR-375 was detected in more differentiated tumours. Kaplan-Meier survival analysis showed that patients with high miR-106b expression had an 81% survival rate vs. 95% (P = 0.004) for patients with low expression.

**Conclusion:** High expression of miR-18a/b are strongly associated with basal-like breast cancer features, while miR-106b can identify a group with higher risk for developing distant metastases in the subgroup of Her2 negatives. Furthermore miR-106b can identify a group of patients with 100% survival within the otherwise considered high risk group of patients with high proliferation. Using miR-106b as a biomarker in conjunction to mitotic activity index could thereby possibly save 18% of the patients with high proliferation from overtreatment.

**Citation:** Jonsdottir K, Janssen SR, Da Rosa FC, Gudlaugsson E, Skaland I, et al. (2012) Validation of Expression Patterns for Nine miRNAs in 204 Lymph-Node Negative Breast Cancers. PLoS ONE 7(11): e48692. doi:10.1371/journal.pone.0048692

**Editor:** Jin Q. Cheng, H.Lee Moffitt Cancer Center & Research Institute, United States of America

**Received:** July 6, 2012; **Accepted:** September 28, 2012; **Published:** November 7, 2012

**Copyright:** © 2012 Jonsdottir et al. This is an open-access article distributed under the terms of the Creative Commons Attribution License, which permits unrestricted use, distribution, and reproduction in any medium, provided the original author and source are credited.

**Funding:** KJ has a grant from Helse Vest, Norway. This study has received financial support from the Folke Hermansen Foundation in 2010 and grants from the Stavanger University Hospital research department in 2009 and 2010. The funders had no role in study design, data collection and analysis, decision to publish, or preparation of the manuscript.

**Competing Interests:** The authors have declared that no competing interests exist.

\* E-mail: emiel.janssen@sus.no

## Introduction

For breast cancer in general lymph node status is still the strongest prognostic factor. Lymph Node negative (LN-) breast cancer patients constitute ~60% of all breast cancer cases. Nowadays almost all of them receive adjuvant treatment despite the fact that ~75% have a good 10-years survival. Over the past decade, especially lymph node negative breast cancer has been intensively investigated by array-based gene expression profiling. These studies have identified new subtypes like luminal A and -B, basal-like and Her2/neu-overexpressing cancers that correlate with different survival outcome [1,2]. Luminal type constitutes the biggest group of breast cancers and is associated with oestrogen receptor alpha (ER $\alpha$ ) positivity which can be further subdivided into luminal A with low and luminal B with high proliferation. Approximately 7–12% of all breast cancers have a Her2

amplification and form the Her2/neu-overexpressing subtype. In contrast, basal-like breast cancers express no hormonal receptors, are cytokeratin 5/6 or 14 positive, associated with poor prognosis and constitute 14–20% of all breast cancer cases [3–5]. Specific gene signatures have also been found to predict therapy response or resistance, hormone receptor status and for identification of patients at risk of distant recurrence following surgery.

In the majority of the prognostic signatures, proliferation associated genes are strongly represented. This confirms numerous studies which have shown that proliferation is the strongest prognostic factor in lymph node negative breast cancer, either measured by mitotic activity index (MAI), Ki67 or phosphohistone H3 (PPH3) [6–8]. In comparison with several prognostic signatures, single genes related to proliferation had similar or even better prognostic value [9]. Although gene expression signatures and proliferation can add prognostic value to the

established prognostic markers for LN- breast cancer, still many breast cancer patients are under- and over-treated. Therefore a better understanding of the complex biology of the different breast cancer subtypes is required.

miRNAs have recently been described as a new mechanism for posttranscriptional regulation of protein transcription. miRNAs are a group of small non-coding RNAs (19–25 nt) that regulate the degradation (perfect match) and translation (imperfect match) of their target mRNA. One miRNA can target up to 200 different mRNAs, tend to be pathway specific [10–12] and are involved in a wide range of biological and pathological processes [13]. In contrast to mRNA, miRNAs are much more stable in formalin fixed paraffin embedded tissue [14] which makes them easy to investigate and increase their potential use as biomarkers in routine diagnostics for breast cancer.

In a previous publication we investigated miRNA expression by microarray analysis in total RNA isolated from fresh frozen tumour from 104 LN- breast cancers, and showed amongst others that miR-106b, miR-18a/b, miR-25, miR-29c and miR-505 were strongly correlated to high proliferation [15] while others correlated with both ER $\alpha$  negativity and CK5/6 positivity. As with all microarray data, these previously published data need to be validated by other methods and in an independent study cohort. In order to achieve this, nine selected microRNAs (let-7b, miR-18a, miR-18b, miR-106b, miR-25, miR-29c, miR-375, miR-424, miR-505) were tested by qPCR in total RNA isolated from 204 new LN- breast cancers patients under the age of 71 and investigated correlations with classic clinicopathological features like proliferation (measured by MAI, PPH3 and Ki67), ER $\alpha$ , progesteron receptor (PR), Her2, and CK5/6.

## Materials and Methods

### Patients and Pathology

The study was approved by the Regional Ethics Committee before the study started. All 240 patients were diagnosed with first onset invasive operable (T<sub>1,2</sub>N<sub>0</sub>M<sub>0</sub>) breast cancer at the Stavanger University Hospital, between January 1, 1996 and December 31, 1998. The following samples were excluded; 34 cases without enough tumour material, one sample had bad fixation and one had too much inflammation, leaving 204 patients for analysis. There were no significant differences between the original 240 and final 204 cases in any of the clinicopathologic features analyzed. The patients were all treated according to the national guidelines of the Norwegian Breast Cancer Group at that time. The auxiliary fat was macroscopically examined and all detectable lymph nodes (median: 12, range: 4–27) were prepared for histology. All tissues were cut in 5 millimeter thick slices, fixed in buffered 4% formaldehyde and embedded in paraffin. Four micrometer histological sections were made and stained with haematoxylin-erythrosin-safran (HES). Histological type and grade were assessed by two pathologists (EG, JB) with considerable experience in breast pathology, according to the World Health Organization criteria [16]. Grade was carefully assessed according to the Nottingham modification [17,18]. The MAI was assessed as described elsewhere [19].

### Immunohistochemistry

ER $\alpha$  and PR, PPH3, Ki67, CK5/6 and Her2 expression were determined by immunohistochemistry (IHC) in whole sections. Antigen retrieval and IHC techniques were based on DAKO technology as described previously [8].

### Quantification of PPH3, Basal Cytokeratin, ER $\alpha$ , PR, Ki67 and Her2

The PPH3 index was assessed as described elsewhere [20]. For measuring % of Ki67 positive cells we used the semi-automatic interactive computerized QPRODIT system (Leica, Cambridge), as described in [21]. The percentage of CK5/6 positive tumour cells in each cancer was scored using a continuous scale of 0–100%. In the final analysis all tumours with any CK5/6 staining in tumour cells were grouped as being positive as described before [22]. ER $\alpha$  was scored positive if  $\geq 1\%$  of tumours cells showed nuclear staining and all others were scored negative. PR was scored as positive when nuclear staining was present in  $>10\%$ , and scored negative when  $<10\%$  of the of the tumour cells had nuclear staining. Her2 was scored according to the DAKO Hercep Test scoring protocol. All 2+ and 3+ cases were regarded as positive. All sections were independently scored by two pathologists. Triple negative breast cancers (TNP) are defined by negativity for ER $\alpha$  (0%), PR ( $<10\%$ ) and Her2 (0 and 1+).

### RNA-isolation and qPCR for FFPE Tissue

All sections were evaluated by an experienced breast pathologist (EG) who selected an area with at least 50% tumour cells for RNA isolation. Five sections of 10  $\mu\text{m}$  were used for RNA isolation. Tumour tissue was isolated by macrodissection from the slides. Total RNA was isolated using miRNeasy for FFPE kit (Qiagen, Valencia, CA) according to the protocol provided by the manufacturer. All samples were analyzed on a Nanodrop instrument (Thermo Fisher Scientific, Waltham, USA). cDNA samples were made out 20 ng of total RNA using the Universal cDNA synthesis kit (Exiqon A/S, Vedbaek, Denmark) according to the manufacturer's recommendations. A 8  $\mu\text{l}$  volume of 80x dilution of cDNA was used in each of the real-time PCR reactions with SYBR<sup>®</sup> green master mix and miRNA LNA<sup>™</sup> PCR primer sets (both from Exiqon A/S), following the manufacturer's instructions. All samples were run in triplicate. In order to find candidates that could be used as control genes, we used the previously published miRNA array data [15] and the free programs Normfinder [23] and GeNorm [24]. miR-24 and miR-26b showed the least variation between the 104 samples. U6 was also included as a reference gene. The average Ct-values of the triplicates for hsa-miR-24 (mean Ct = 22.73, std. = 1.33) and hsa-miR-26b (mean Ct = 26.17, std. = 1.66) were used as the endogenous reference and relative expression of target genes was calculated via the equation  $2^{-\Delta\text{Ct}}$ . U6 was later excluded by GeNorm and Normfinder because of too much variation (mean Ct = 26.43, std. 1.87) between the different patient samples.

### Survival Endpoints

For survival analysis, the end point used was distant metastasis free survival (DMFS) and which we defined as any recurrence at a distant site. Patients were censored from the date of the last follow-up visit for death from causes other than breast cancer, local or regional recurrences, and the development of a second primary cancer, including contra lateral breast cancer. If a patient's status during follow-up indicated a confirmed metastasis without a recurrence date, the follow-up visit date was used. Age, time to first recurrence and survival time were calculated relative to the primary diagnosis date.

### Statistical Analyses

SPSS (SPSS, Chicago, Illinois, USA) for Windows version 18.0 was used. Kaplan–Meier survival curves were constructed and differences between groups were tested by the log rank test. The

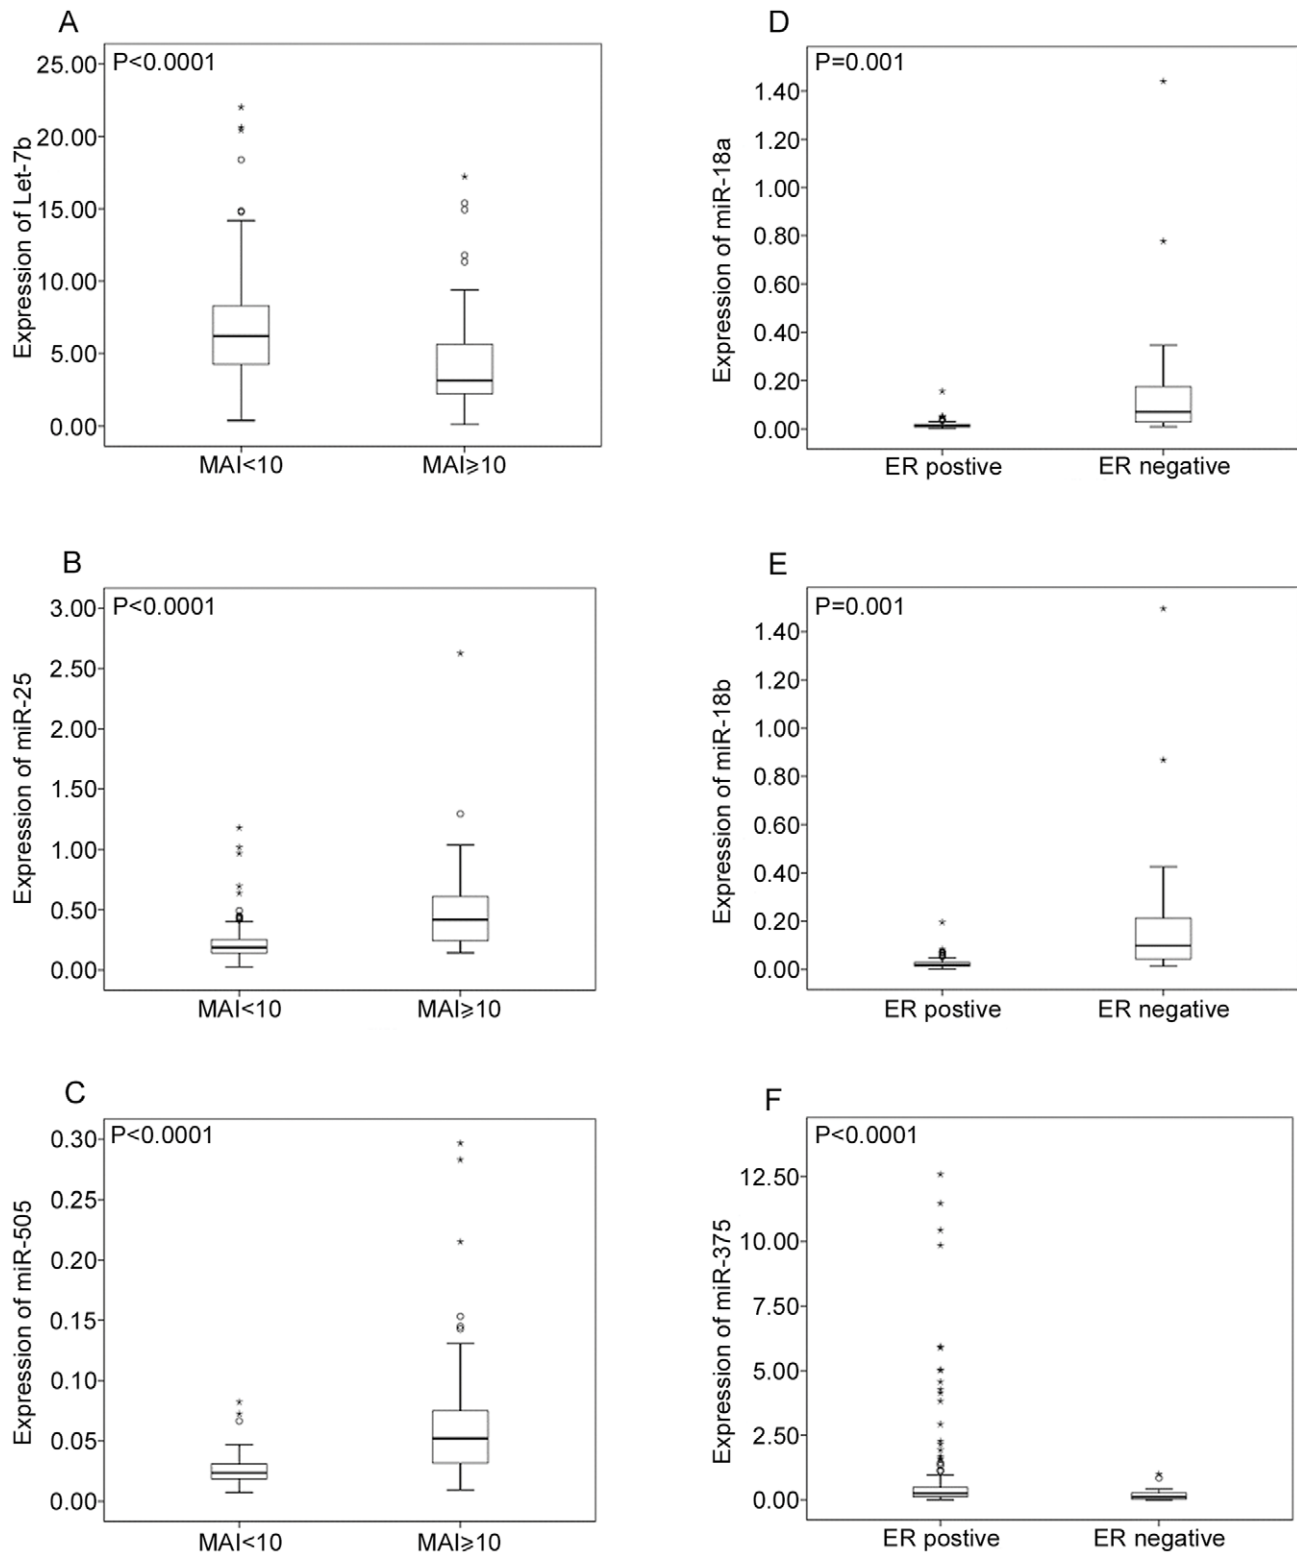

**Figure 1. Expression level of miRNAs for different prognostic features.** Independent T-test was used to determined significant relationship. Let-7b is down-regulated in high MAI  $\geq 10$  (A), miR-25 (B) and miR-505 (C) are expressed higher in MAI  $\geq 10$ . MiR-18a (D) and miR-18b (E) are expressed higher in ER $\alpha$  negative patients, while miR-375 (F) is down-regulated in ER $\alpha$  negative breast cancer patients. doi:10.1371/journal.pone.0048692.g001

relative importance of potential prognostic variables was tested using univariate and multivariate (for 196 patients all features were available) Cox-proportional hazard analysis (forward, Wald) and

expressed as a Hazards Ratio (HR) with 95% confidence intervals (CI). Dchip software (version 31 March 2009) ([www.dchip.org](http://www.dchip.org)) was used for hierarchical cluster analysis. The qPCR data were

**Table 1.** Independent t-test between miRNAs and different clinical features for breast cancer.

|                | High Proliferation | ER–      | PR–      | TNP–     | CK5/6+   |
|----------------|--------------------|----------|----------|----------|----------|
| <b>Let-7b</b>  | P<0.0001           | P<0.0001 | P=0.005  | P<0.0001 | P<0.0001 |
| miR-106b       | P<0.0001           | P<0.0001 | P=0.001  | P<0.0001 | P=0.044  |
| miR-18a        | P<0.0001           | P=0.001  | P=0.001  | P=0.003  | P=0.003  |
| miR-18b        | P<0.0001           | P=0.001  | P=0.003  | P=0.002  | P=0.002  |
| miR-25         | P<0.0001           | P<0.0001 | P<0.0001 | P<0.0001 | P=0.004  |
| <b>miR-29c</b> | P<0.05*            | P<0.0001 |          | P<0.0001 | P<0.0001 |
| <b>miR-375</b> |                    | P<0.0001 |          |          | P<0.0001 |
| miR-424        |                    |          |          |          |          |
| miR-505        | P<0.0001           | P<0.0001 | P=0.001  | P=0.001  | P=0.002  |

Proliferation includes MAI, PPH3 and Ki67. Star indicated that Ki67 did not give P-value under 0.05. The miRNAs with underscore/fat are inversely correlated to the different clinical features, meaning that low expression of let-7b is significantly associated to high proliferation.  
doi:10.1371/journal.pone.0048692.t001

standardized as follows, subtracting mean and divided by standard deviation. Genes were filtered using analysis of variance, p-value  $\leq 0.01$  and absolute correlation (meaning including genes with opposite profile). These gene lists were used to classify samples by cluster analysis and linear discriminate analysis (LDA). The optimal expression threshold for miR-106b was determined by Receiver Operating Characteristic (ROC) curve analysis (MedCalc statistical software v. 9.3.7, MedCalc, Mariakerke, Belgium).

## Results

Median age was 57 (range 30–71 years) with median follow-up of 122 months (range 10–178 months). Twenty-nine patients developed distant metastasis or died from breast cancer. Table 1 shows the significant associations between the nine miRNAs and the clinicopathological features. The most significant differences between the miRNAs and the clinicopathological features are

illustrated by boxplots in figure 1 and all other boxplots are shown in figure S1, S2, S3, S4, S5. Three of the nine miRNAs studied (let-7b, miR-29c, and miR-375) are inversely correlated to the classical prognostic features (proliferation, ER/PR and tumour size) and can be regarded as tumour suppressive. Let-7b was the most differently expressed miRNA (std. = 3.99) and low expression of let-7b was significantly linked to high proliferation (Figure 1A), TNP, ER $\alpha$  negative, CK5/6 positivity. miR-29c showed significant (P<0.0001) associations to high proliferation, TNP, ER $\alpha$  negativity and CK5/6 positivity. Low expression of miR-375 was only significantly associated to ER $\alpha$  negativity (P<0.0001, Figure 1F) and CK5/6 positivity. miR-424 was not associated to any of the different clinicopathological features. High expression of miR-25 was significantly associated to ER $\alpha$  negativity, high proliferation (Figure 1B), TNP and CK5/6 positivity. Furthermore miR-25 correlated very strongly to miR-106b (corr. = 0.428, P=0.0001). miR-505 was also expressed at low levels in all patients. Strong and significant associations between high miR-505 expression and ER $\alpha$  negativity, high proliferation, TNP (Figure 1C) and CK5/6 positivity were found. High expression of miR-18a and miR-18b was also significantly associated with high proliferation, ER $\alpha$  negativity (Figure 1D and 1E), TNP and CK5/6 positive breast cancers. miR-18a and miR-18b were also expressed at lower levels in all samples and their expression profile are strongly correlated to each other (Pearson correlation = 0.995, p<0.0001).

Table 2 shows the survival and hazard ratios for the classical tumour characteristics and the nine miRNAs for DMFS. The cut-off values used for the survival analyses for each microRNA were obtained by ROC analysis (Table S1 and Figure S6). Median and 3-quantiles split of the continuous expression data, were also tested against DMFS. miR-106b was the only miRNA which had a significant area under the curve by ROC analysis in relation to DMFS. Furthermore Kaplan Meier curve analysis with miR-106b gave a significant separation between good and bad prognosis, independent of the type of cut-off value chosen (ROC cut-off, median and tertiles). ROC-curve analysis showed that a threshold of >0.0172 expression (area under curve: 0.665), was optimal for identification of patients at risk of developing distant metastasis. This threshold was used to divide the patient in two groups

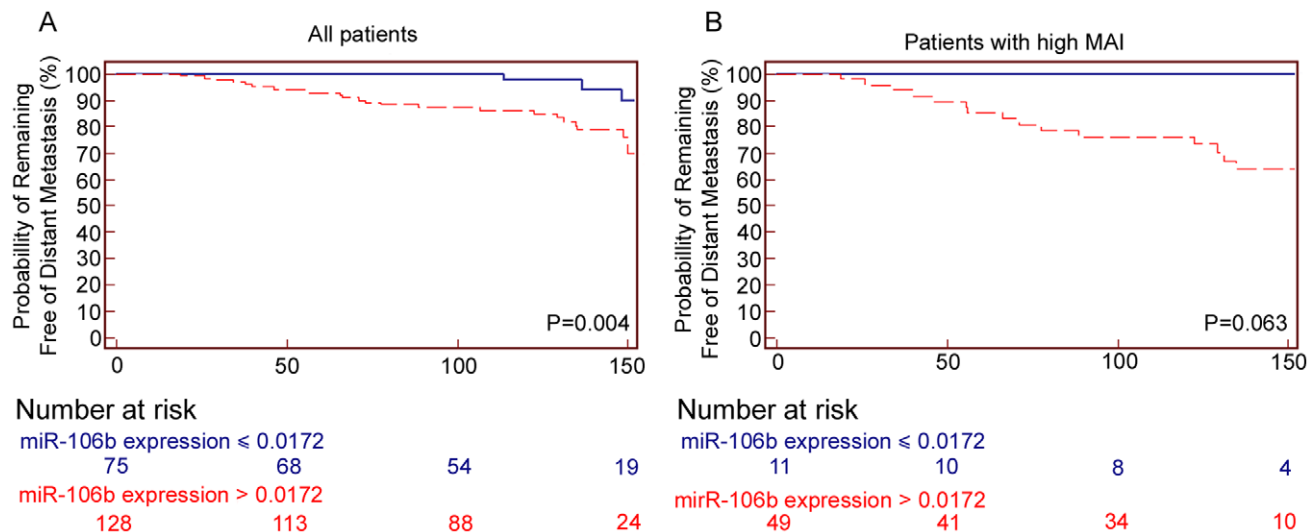**Figure 2.** Long-term distant metastasis free survival curves according to miR-106b expression level and miR-106b expression in patients with MAI $\geq 10$ .

doi:10.1371/journal.pone.0048692.g002

**Table 2.** Distant metastasis free survival in lymph node-negative breast cancer patient with Kaplan Meier and cox multivariate analysis.

| Characteristic          | Distant metastasis |                  |     |          |
|-------------------------|--------------------|------------------|-----|----------|
|                         | Event/at risk (%)  | Log-rank P-value | HR  | 95% CI   |
| <b>Age</b>              |                    |                  |     |          |
| <55 years               | 13/92 (86)         | 0.375            | 1.4 | 0.7–2.9  |
| ≥55 years               | 16/112 (86)        |                  |     |          |
| <b>Tumour diameter</b>  |                    |                  |     |          |
| <2 cm                   | 16/148 (89)        | 0.045            | 2.1 | 1.0–4.4  |
| ≥2 cm                   | 13/56 (77)         |                  |     |          |
| <b>Nottingham grade</b> |                    |                  |     |          |
| 1                       | 2/64 (97)          | 0.010            | 5.5 | 1.3–23.2 |
| 2 and 3                 | 27/140 (81)        |                  |     |          |
| <b>ER</b>               |                    |                  |     |          |
| Positive ≥1%            | 20/164 (88)        | 0.335            | 1.5 | 0.7–3.4  |
| Negative                | 8/39 (80)          |                  |     |          |
| <b>PR</b>               |                    |                  |     |          |
| Positive ≥10%           | 17/123 (86)        | 0.798            | 1.1 | 0.5–2.3  |
| Negative 0–9%           | 12/81 (81)         |                  |     |          |
| <b>Her2</b>             |                    |                  |     |          |
| 0–1+                    | 20/176 (89)        | 0.002            | 3.2 | 1.5–7.1  |
| 2+–3+                   | 9/25 (64)          |                  |     |          |
| <b>MAI</b>              |                    |                  |     |          |
| <10                     | 14/144 (90)        | 0.006            | 2.7 | 1.3–5.8  |
| ≥10                     | 15/60 (75)         |                  |     |          |
| <b>MAI</b>              |                    |                  |     |          |
| MAI 0–2                 | 6/100 (94)         | 0.004            | 3.2 | 1.1–9.3  |
| MAI 3–9                 | 8/44 (81)          |                  | 4.6 | 1.7–12.0 |
| MAI ≥10                 | 15/60 (75)         |                  |     |          |
| <b>Ki67</b>             |                    |                  |     |          |
| 0–9%                    | 8/94 (92)          | 0.018            | 2.6 | 1.1–6.1  |
| 10–100%                 | 19/88 (78)         |                  |     |          |
| <b>PPH3</b>             |                    |                  |     |          |
| <13                     | 9/122 (93)         | 0.002            | 3.5 | 1.5–7.9  |
| ≥13                     | 20/80 (75)         |                  |     |          |
| <b>CK5/6</b>            |                    |                  |     |          |
| Negative                | 23/175 (87)        | 0.407            | 1.5 | 0.6–3.6  |
| Positive                | 6/28 (79)          |                  |     |          |
| <b>Triple Negative</b>  |                    |                  |     |          |
| Positive                | 23/174 (87)        | 0.362            | 1.5 | 0.6–3.7  |
| Negative                | 6/30 (80)          |                  |     |          |
| <b>Let-7b</b>           |                    |                  |     |          |
| >3.2792                 | 14/146 (90)        | 0.007            | 2.7 | 1.3–5.7  |
| ≤3.2792                 | 15/58 (74)         |                  |     |          |
| <b>miR-106b</b>         |                    |                  |     |          |
| ≤0.0172                 | 4/75 (95)          | 0.004            | 4.3 | 1.5–12.6 |
| >0.0172                 | 25/128 (81)        |                  |     |          |
| <b>miR-18a</b>          |                    |                  |     |          |
| ≤0.0121                 | 6/77 (92)          | 0.083            | 2.2 | 0.9–5.4  |

**Table 2.** Cont.

| Characteristic | Distant metastasis |                  |     |         |
|----------------|--------------------|------------------|-----|---------|
|                | Event/at risk (%)  | Log-rank P-value | HR  | 95% CI  |
| >0.0121        | 22/125 (82)        |                  |     |         |
| <b>miR-18b</b> |                    |                  |     |         |
| ≤0.025         | 10/114 (91)        | 0.033            | 2.3 | 1.0–4.9 |
| >0.025         | 18/87 (79)         |                  |     |         |
| <b>miR-25</b>  |                    |                  |     |         |
| ≤0.2509        | 11/119 (91)        | 0.022            | 2.4 | 1.1–5.3 |
| >0.2509        | 17/84 (80)         |                  |     |         |
| <b>miR-29c</b> |                    |                  |     |         |
| >1.1674        | 7/78 (91)          | 0.113            | 2.0 | 1.0–4.3 |
| ≤1.1674        | 22/126 (83)        |                  |     |         |
| <b>miR-375</b> |                    |                  |     |         |
| ≤0.3487        | 14/136 (90)        | 0.054            | 2.0 | 1.0–4.3 |
| >0.3487        | 14/67 (79)         |                  |     |         |
| <b>miR-424</b> |                    |                  |     |         |
| ≤0.7702        | 18/146 (88)        | 0.388            | 1.4 | 0.7–2.9 |
| >0.7702        | 11/57 (81)         |                  |     |         |
| <b>miR505</b>  |                    |                  |     |         |
| ≤0.0182        | 3/40 (93)          | 0.295            | 1.9 | 0.6–6.2 |
| >0.0182        | 25/163 (85)        |                  |     |         |

HR hazard ratio, CI confidence interval.  
doi:10.1371/journal.pone.0048692.t002

(≤0.0172 = low expression of miR-106b (n = 75), >0.0172 = high expression of miR-106b, n = 128)). Kaplan-Meier survival analysis showed that 4 of 75 (= 5%) patients with low expression of miR-106b developed distant metastasis, while 25 of 128 (= 19%) patients with high expression. Survival rates were 95% vs. 81%, respectively (P = 0.004) (Figure 2A). In addition, miR-106b is significantly correlated with ERα negative, TNP and CK5/6 positivity.

Univariate cox-regression of all the clinicopathological parameters for DMFS showed that only tumour diameter, Nottingham grade, Her2, MAI, Ki67, PPH3 and miR-106b were significant. A multivariate survival analysis, including all features that were significant by univariate analysis, showed that Her2 and miR-106b were the strongest prognostic factors for DMFS (HR = 5.5, 95%

**Table 3.** Kaplan-Meier survival analysis for Her2 and miR-106b.

| Characteristic       | Distant metastases |                  |
|----------------------|--------------------|------------------|
|                      | Event/at risk (%)  | Log-rank P-value |
| <b>Her2 negative</b> |                    |                  |
| miR-106b ≤0.0172     | 3/69 (96)          | 0.015            |
| miR-106b >0.0172     | 17/107 (84)        |                  |
| <b>Her2 positive</b> |                    |                  |
| miR-106b ≤0.0172     | 1/6 (83)           | 0.155            |
| miR-106b >0.0172     | 8/18 (56)          |                  |

doi:10.1371/journal.pone.0048692.t003

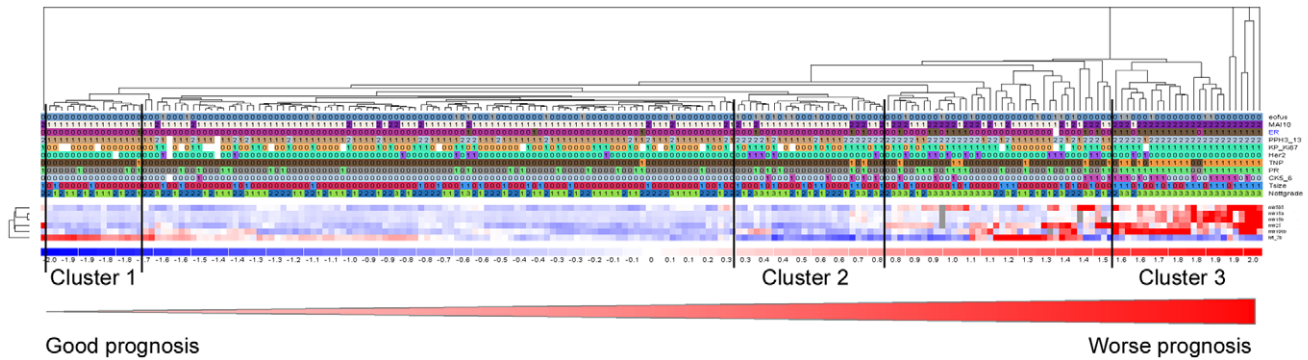

**Figure 3. Supervised hierarchical clustering for ER $\alpha$ .** Genes were filtered using analysis of variance, p-value  $\leq 0.0001$  and absolute correlation for ER $\alpha$ . The heat-map diagram shows the result of the two-way hierarchical clustering of miRNAs and samples. Good prognosis indicates patients with DMFS, while worse prognosis refers to patients with distant metastasis or who have died of distant metastasis. Each row represents a miRNA and each column represents a patient sample. The miRNA clustering tree is shown on the left, and the sample clustering tree appears at the top. The colour scale shown at the bottom illustrates the relative expression level of a miRNA across all samples: red colour represents an expression level above mean, blue colour represents expression lower than the mean. Gray colour means that the specific miRNA has not been successfully detected with qPCR. Numbers for clinicopathological features indicate the following: EOFUS (0 = no distant metastasis, 1 = distant metastasis), MAI10 (0 < 10, 1  $\geq 10$ ), ER $\alpha$  (0 < 1% positive tumour cells, 1  $\geq 1\%$  positive tumour cells), PPH3\_13 (0 < 13, 1  $\geq 13$ ), KP\_Ki67 (0 < 10%, 1  $\geq 10\%$ ), Her2 (0 = 0 or 1+, 1 = 2+ or 3+), TNP (0 = positive for either ER $\alpha$ /PR/Her2, 1 = negative for ER $\alpha$  and PR and Her2), PR (0  $\leq 10\%$  positive tumour cells, 1 > 10% positive tumour cells), CK5/6 (0 = no staining, 1 = any percentage of positive tumour cells), Tsize (Tumour size: 0  $\leq 2$ cm, 1 > 2 cm) and Nottgrade (Nottingham grade: 1 = grade 1, 2 = grade 2, 3 = grade 3). doi:10.1371/journal.pone.0048692.g003

CI 1.6–18.5). Her2 positive patients with low expression of miR-106b have a DMFS of 83% vs. 56% for patients with high expression (Table 3). miR-106b expression shows also a trend for additional prognostic information in the group of patients with high proliferation (MAI  $\geq 10$ ) (Figure 2B), with respectively 100% vs. 69% (p = 0.063) for high vs. low expression of miR-106b.

Since some of the microRNAs correlated to the same clinicopathological parameters we used hierarchical cluster analysis to illustrate the expression level in all patients in comparison with the different parameters (Figure 3). Figure 3 is a supervised hierarchical cluster of ER $\alpha$  driven genes (Anova analysis, P < 0.0001). This analysis confirms the tight connections between miR-18a and miR-18b to ER $\alpha$  negative cancers. Furthermore, high expression of let-7b was associated with favourable prognostic

features (low proliferation, ER $\alpha$ /PR positivity, HER2/CK5/6 negativity and tumour size < 2 cm) (cluster 1). As figure 3 indicates, a shift from high to low expression of let-7b points toward worse prognosis. Low expression of let-7b, miR-25 and miR-505 and little expression of miR-18a, miR-18b and miR-106b can identify a small group of patients (cluster 2) in which 8 of 25 patients develop distant metastasis. While patients with both high proliferation, TNP, CK5/6 positive, tumour size  $\geq 2$  cm and grade 3 cluster significantly together and have high expression of miR-505, miR-18a/b, miR-25, miR-106b and low expression of let-7b (Figure 3, cluster 3).

**Discussion**

The current validation study by means of another analytical method and in FFPE material of new LN- breast cancer patients shows many of the same correlations between miRNAs and clinicopathological features as described before [15]. Moreover, miR-106b had strong prognostic univariate and multivariate prognostic value.

The family of miRNA let-7b was one of the first miRNAs to be discovered as non-coding RNA [25] and has been well investigated. Let-7b has been reported as a tumour-suppressor gene in cancers of the breast [26], pancreas [27] and stomach [28]. Some suggest that let-7b and its family regulate ER $\alpha$  activity and expression [29,30], others show that let-7b expression correlates to luminal subtypes, thereby suggesting that tumours which maintain let-7b expression are less metastatic [26]. These findings support our current results that high expression of let-7b is associated with patients with favourable prognostic factors like low proliferation, ER $\alpha$ /PR positivity, Her2/CK5/6 negativity and tumour size < 2 cm.

Our data also suggest that miR-29c acts as a tumour suppressor gene, as it shows low expression in TNP, ER $\alpha$  negative or CK5/6 positive cancers. In a recent, elaborate miRNA profiling study containing 207 breast cancers high expression of miR-29c was also associated with good prognosis [31]. Tumour necrosis factor alpha-induced protein 3 (TNFAIP3), a key regulator in inflammation and immunity, was found to be inversely correlated with

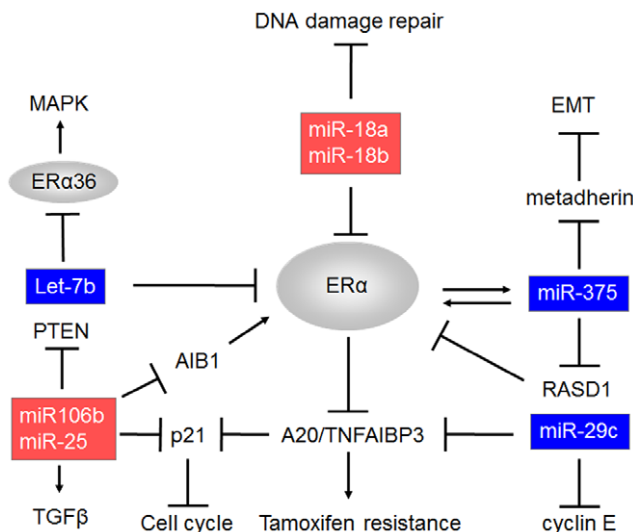

**Figure 4. An illustration of the miRNAs impact on ER $\alpha$ , based on literature and results presented in this paper.** doi:10.1371/journal.pone.0048692.g004

**Table 4.** Pathway analysis of the nine microRNAs by means of Diana microT 4.0 (beta version), PicTar and Targetscan 5.

| microRNA | KEGG pathway                                            | Prediction Pathway        | KEGG-pathway ID      | Highest -ln (p-value)         | Number of Genes | Genes                                                                                                                                                         |
|----------|---------------------------------------------------------|---------------------------|----------------------|-------------------------------|-----------------|---------------------------------------------------------------------------------------------------------------------------------------------------------------|
| Let 7b   | MAPK signaling pathway                                  | PT<br>TS5<br>Diana 4.0    | hsa04010             | 12.3 (PT)                     | 27              | MAP4K3, MAP4K4, DUSP4, CSDE1, TGFBR1, PDGFB, MAP3K7IP2, DUSP9, FASLG, CACNA1D, DUSP16, MAP3K3, PAK1, FGF11, PPP3CA, ACVR1B, PLA2G3, NLK, DUSP1, ACVR1C, CASP3 |
| miR-18a  | P53-signaling pathway<br>Ubiquitin mediated proteolysis | Diana 4.0+ TS<br>PT + TS5 | hsa04115<br>hsa04120 | 13.0 (Diana 4.0)<br>5.3 (TS5) | 5<br>5          | THBS1, ATM, CDK2, CCND2, IGF1<br>UBE2G1, UBE2Z, MAP3K1, PIAS3, NEDD4                                                                                          |
| miR-18b  | P53-signaling pathway                                   | TS5<br>Diana-4.0          | hsa04115             | 11.9 (Diana 4.0)              | 5               | THBS1, ATM, CDK2, CCND2, IGF1                                                                                                                                 |
| miR-106b | TGF-beta signaling pathway                              | PT<br>TS5<br>Diana-4.0    | hsa04350             | 17,2 (PT)                     | 12              | E2F5, RBL2, DOCK5, ZFYVE9, SMAD7, SMAD6, RBL1, SMAD5, PPP2CA, ACVR1B, BMPR2, EP300                                                                            |
| miR-25   | Phosphatidylinositol signaling system                   | PT<br>TS5<br>Diana-4.0    | hsa04070             | 7.5 (TS5)                     | 8               | SYNJ1, ITPR1, CALM1,CALM2,CALM3, IMPA2, PIP5K1C, PIP4K2C, PIP5K3, PIK3R3                                                                                      |
| miR-29c  | ECM-receptor interaction                                | PT<br>TS5<br>Diana-4.0    | hsa04512             | 47.16 (Diana 4.0)             | 20              | COL6A3, COL4A6, FN1, COL5A1, COL1A1, LAMA2, COL3A1, DAG1, ITGA2, ITGA6, COL4A4, COL5A3, HSPG2, COL5A2, COL1A2, ITGA11, COL2A1, LAMC1, COL4A1, COL11A1         |
| miR-375  | Biotin metabolism                                       | PT<br>TS5<br>Diana-4.0    | hsa00780             | 6.36 (TS5)                    | 1               | HLCS                                                                                                                                                          |
| miR-424  | Prostate cancer                                         | TS5<br>Diana-4.0          | hsa05215             | 13.3(TS5)                     | 15              | BCL2, CCNE1, E2F3, CSDE1, IGF1R, MAP2K1, PIK3R1, SOS1, FGFR1, FOXO1, IKBKB, IGF1, AKT3, CCND1, RAF1                                                           |
| miR-505  | Tight junction                                          | TS5<br>Diana-4.0          | hsa04530             | 4.07 (TS5)                    | 4               | ACTN2, VAPA, JAM3, MYH10                                                                                                                                      |

Only the most significant (from the top three) pathway that is common in all three software programmes is mentioned. Abbreviations: Diana 4.0=Diana microT 4.0 (beta version), PT = PicTar, TS5 = Targetscan 5.

doi:10.1371/journal.pone.0048692.t004

miR-29c levels and was identified as a target of miR-29c [32]. Furthermore, high TNFAIP3 expression levels were observed in more aggressive breast tumours (ER $\alpha$ /PR negative and high histological grade) [33]. Other reports indicate the same in lung cancer [34] and nasopharyngeal carcinomas [35], while others state it as up-regulated in breast cancer tissue in comparison with normal adjacent tumour tissues [36].

Reports from both breast cancer tissue and breast cancer cell lines show that miR-18a and miR-18b are highly expressed in ER $\alpha$  negative breast cancer [37,38]. Transfection of pre-miR-18a or pre-miR-18b to MCF7 cell lines, showed a reduced level of ER $\alpha$  mRNA and therefore it was concluded that ER $\alpha$  is a direct target for these miRNAs. Also in the same study, an increasing number of cells in G1/G0 phase of the cell cycle, when cells are stimulated with these miRNAs, was reported [38]. Previous results [15] and the current validation study show that high expression of miR-18a and miR-18b is associated with high proliferation, ER $\alpha$  negative, TNP and CK5/6 positivity, thereby indicating that these miRNAs could be markers for basal-like breast cancers. miR-18a and miR-18b have nearly identical sequences and our data show that their expression is strongly correlated. miR-106b is part of the same family as miR-18a and miR-18b, and has been reported up-regulated in several types of cancer, including colonic cancer [39], gastric cancer [40], laryngeal cancer [41] and breast cancer [42,43]. Some of these findings suggest that miR-106b affects the cell cycle progression by targeting p21, a cyclin-dependent kinase inhibitor [42,44]. Smith et al demonstrate a significant correlation between miR-106b and Six1 and activated TGF $\beta$  (nuclear Smad3), suggesting that high miR-106b leads to increased tumour initiating cell capacity and epithelial to mesenchymal transition

[42]. Both these and our results indicate that miR-106b is a prognostic marker in breast cancer, but needs to be confirmed in independent study.

miR-106b is located in the intron of gene minichromosome maintenance protein 7 (Mcm7) [45], together with miR-25 and miR-93. Petrocca et al and others showed that BCL2L11 (Bim) is a direct target for miR-25 [46–48]. Bim protein is essential in regulation of apoptosis (review in [49]). Our results showed that miR-25 is significantly up-regulated in tumours with high proliferation, ER $\alpha$  negativity or CK5/6 positivity, all signs of low apoptosis. Although miR-106b and miR-25 are located in the same cluster and thereby thought to be expressed equally, we found no strong correlation between these miRNAs. This could signify a posttranscriptional mechanism that plays a key role in determining the levels of these mature miRNAs [50].

miR-505 is associated with apoptosis [51,52]. Results of studies of drug-resistant breast cancer cell lines showed that transfection with miR-505 induced apoptosis by targeting alternative splicing factor/splicing factor 2 (ASF/SF2) [51]. Moreover, gene expression data from mouse mammary tumours associate miR-505 with basal-like breast cancer [53]. This also agrees with our data that high expression of miR-505 correlates with positivity for CK5/6, ER $\alpha$  negativity and high proliferation.

There are only a few reports on miR-375 in breast cancer. Our data show that miR-375 is highly expressed in ER $\alpha$  positive and CK5/6 negative tumours. Down-regulation of miR-375 in colorectal cancer [54], squamous cervical cancer [55] and oesophageal cancer [56] suggests that miR-375 could target a tumour promoter gene. Newly published data showed that miR-375 expression was reduced in tamoxifen resistant cell lines

compared with wild type cells [57]. That study observed an increased expression of epithelial markers, E-cadherin and ZO-1 mRNA level, and a decreased level of mesenchymal markers like (fibronectin, ZEB1 and SNAI2/slug) after re-expression of miR-375. This suggests that miR-375 and one of its targets metadherin play a central role in the epithelial to mesenchymal (EMT) transition. Other publications that correlate miR-375 positivity with ER $\alpha$  expression in breast cell lines by targeting RAS dexamethasone-induced 1 [58] and the fact that higher level of miR-375 in has been detected in ER $\alpha$  negative breast cancer patient [59], fit well with this hypothesis.

As shown in figure 3 and 4 most of the miRNAs tested in this study are strongly related to proliferation, ER $\alpha$  and CK5/6; of these processes ER $\alpha$  is probably the most central. Although the correlation are strongly significant the effects can still be indirect, therefore we performed pathway analysis of the nine miRNAs by means of different software tools like Diana microT 4.0 (beta version), Pictar and Targetscan 5 [60]. The most significant (top three) pathway that is common in all three software programmes are mentioned and shown in table 4. Comparison of these pathways and the results presented in the current study clearly shows the complexity of the function of miRNAs as none of the analysis showed ER pathway, CK 5/6 or cell cycle as most important pathway.

On the other hand the fact that miRNAs can act on different processes at the same time is often used to suggest there potential as possible drug targets. Upregulation of let-7b and down regulation of miR-106b could be used for such strategy. This double action would in theory knock-out both the genomic and the non-genomic action of ER $\alpha$  and thereby possibly stop many of its carcinogenic roles.

The strength of this study is the fact that we validate the correlation between nine microRNAs and important clinicopathological features by a new method and in a new and larger cohort of patients. All patients come from the same hospital as the previous study, analyses of the clinicopathological features is all performed by highly standardized and reproducible methods.

The limitations of the study are the fact that total RNA was isolated from tissue with at least 50% tumour cells, so the expression levels might be different if pure tumour populations would be studied. In situ hybridization with the nine microRNAs could shed light on the location of the microRNAs in tissue and show whether the microRNAs are cell specific or not. Another important issue is the use of control molecules in qPCR experiments that involve microRNA. The use of U6 is strongly debated and different molecules have otherwise been used, in the current study we have analyzed all the data from our previous

study by Normfinder and GeNorm in order to find the microRNA with the least variation in expressions levels.

In conclusion, we confirm our previously published data in a new and larger group of LN- breast cancer. These results indicate that high expression of miR-505, miR-18a, miR-18b, miR-25, miR-106b and low expression of let-7b are highly associated to unfavourable prognosis in LN- breast cancer patients. Furthermore, miR-106b has additional prognostic value to both MAI and Her2.

## Supporting Information

**Figure S1 Expression level of miRNAs vs MAI.** Independent T-test was used to determined significant relationship. (TIF)

**Figure S2 Expression level of miRNAs vs ER $\alpha$ .** Independent T-test was used to determined significant relationship. (TIF)

**Figure S3 Expression level of miRNAs vs PR.** Independent T-test was used to determined significant relationship. (TIF)

**Figure S4 Expression level of miRNAs vs TNP.** Independent T-test was used to determined significant relationship. (TIF)

**Figure S5 Expression level of miRNAs vs CK5/6.** Independent T-test was used to determined significant relationship. (TIF)

**Figure S6 ROC-curve analyses of all miRNAs vs DMFS.** (TIF)

**Table S1 ROC-curve analyses of microRNAs and the different biological features for breast cancer.** (DOC)

## Acknowledgments

The authors thank Bianca van Diemen Hidle for excellent technical assistance.

## Author Contributions

Conceived and designed the experiments: KJ JPAB EAMJ. Performed the experiments: KJ SRJ FCDR EG IS. Analyzed the data: KJ SRJ JPAB EAMJ. Wrote the paper: KJ JPAB EAMJ.

## References

- Perou CM, Sorlie T, Eisen MB, van de Rijn M, Jeffrey SS, et al. (2000) Molecular portraits of human breast tumours. *Nature* 406: 747–752.
- Sorlie T, Perou CM, Tibshirani R, Aas T, Geisler S, et al. (2001) Gene expression patterns of breast carcinomas distinguish tumor subclasses with clinical implications. *Proc Natl Acad Sci U S A* 98: 10869–10874.
- Yang XR, Sherman ME, Rimm DL, Lissowska J, Brinton LA, et al. (2007) Differences in risk factors for breast cancer molecular subtypes in a population-based study. *Cancer Epidemiol Biomarkers Prev* 16: 439–443.
- Fan C, Oh DS, Wessels L, Weigelt B, Nuyten DS, et al. (2006) Concordance among gene-expression-based predictors for breast cancer. *N Engl J Med* 355: 560–569.
- Carey LA, Perou CM, Livasy CA, Dressler LG, Cowan D, et al. (2006) Race, breast cancer subtypes, and survival in the Carolina Breast Cancer Study. *JAMA* 295: 2492–2502.
- Baak JP, van Diest PJ, Voorhorst FJ, van der Wall E, Beex LV, et al. (2005) Prospective multicenter validation of the independent prognostic value of the mitotic activity index in lymph node-negative breast cancer patients younger than 55 years. *J Clin Oncol* 23: 5993–6001.
- Lende TH, Janssen EA, Gudlaugsson E, Voorhorst F, Smaaland R, et al. (2011) In patients younger than age 55 years with lymph node-negative breast cancer, proliferation by mitotic activity index is prognostically superior to adjuvant! *J Clin Oncol* 29: 852–858.
- Skaland I, Janssen EA, Gudlaugsson E, Klos J, Kjellevoid KH, et al. (2009) Validating the prognostic value of proliferation measured by Phosphohistone H3 (PPH3) in invasive lymph node-negative breast cancer patients less than 71 years of age. *Breast Cancer Res Treat* 114: 39–45.
- Desmedt C, Haihe-Kains B, Wirapati P, Buyse M, Larsimont D, et al. (2008) Biological processes associated with breast cancer clinical outcome depend on the molecular subtypes. *Clin Cancer Res* 14: 5158–5165.
- Valastyan S, Benaich N, Chang A, Reinhardt F, Weinberg RA (2009) Concomitant suppression of three target genes can explain the impact of a microRNA on metastasis. *Genes Dev* 23: 2592–2597.
- Lewis BP, Shih IH, Jones-Rhoades MW, Bartel DP, Burge CB (2003) Prediction of mammalian microRNA targets. *Cell* 115: 787–798.
- Friedman RC, Farh KK, Burge CB, Bartel DP (2009) Most mammalian mRNAs are conserved targets of microRNAs. *Genome Res* 19: 92–105.



13. Lewis BP, Burge CB, Bartel DP (2005) Conserved seed pairing, often flanked by adenosines, indicates that thousands of human genes are microRNA targets. *Cell* 120: 15–20.
14. Xi Y, Nakajima G, Gavin E, Morris CG, Kudo K, et al. (2007) Systematic analysis of microRNA expression of RNA extracted from fresh frozen and formalin-fixed paraffin-embedded samples. *RNA* 13: 1668–1674.
15. Janssen EA, Sleva A, Gudlaugsson E, Jonsdottir K, Skaland I, et al. (2010) Biologic profiling of lymph node negative breast cancers by means of microRNA expression. *Mod Pathol* 23: 1567–1576.
16. Organization WH (1981) *Histologic typing of breast tumors (second ed)* World Health Organization, Geneva.
17. Ellis IO, Schnitt S.J., Sastre-Garau X. (2003) Invasive breast carcinoma, in: *Pathology and Genetics of Tumors of the Breast and Female Genital Tract Organs*. 18–19.
18. Elston CW, Ellis IO (1991) Pathological prognostic factors in breast cancer. I. The value of histological grade in breast cancer: experience from a large study with long-term follow-up. *Histopathology* 19: 403–410.
19. Baak JP, van Diest PJ, Ariens AT, van Beek MW, Bellot SM, et al. (1989) The Multicenter Morphometric Mammary Carcinoma Project (MMMCP). A nationwide prospective study on reproducibility and prognostic power of routine quantitative assessments in The Netherlands. *Pathol Res Pract* 185: 664–670.
20. Skaland I, Janssen EA, Gudlaugsson E, Klos J, Kjellevoid KH, et al. (2007) Phosphohistone H3 expression has much stronger prognostic value than classical prognosticators in invasive lymph node-negative breast cancer patients less than 55 years of age. *Modern Pathology* 20: 1307–1315.
21. Gudlaugsson E, Skaland I, Janssen EA, Smaaland R, Shao Z, et al. (2012) Comparison of the effect of different techniques for measurement of Ki67 proliferation on reproducibility and prognosis prediction accuracy in breast cancer. *Histopathology*.
22. Skaland I, Janssen EA, Gudlaugsson E, Hui Ru Guo L, Baak JP (2009) The prognostic value of the proliferation marker phosphohistone H3 (PPH3) in luminal, basal-like and triple negative phenotype invasive lymph node-negative breast cancer. *Cell Oncol* 31: 261–271.
23. Andersen CL, Jensen JL, Orntoft TF (2004) Normalization of real-time quantitative reverse transcription-PCR data: a model-based variance estimation approach to identify genes suited for normalization, applied to bladder and colon cancer data sets. *Cancer Res* 64: 5245–5250.
24. Vandesompele J, De Preter K, Pattyn F, Poppe B, Van Roy N, et al. (2002) Accurate normalization of real-time quantitative RT-PCR data by geometric averaging of multiple internal control genes. *Genome Biol* 3: RESEARCH0034.
25. Reinhart BJ, Slack FJ, Basson M, Pasquinelli AE, Bettinger JC, et al. (2000) The 21-nucleotide let-7 RNA regulates developmental timing in *Caenorhabditis elegans*. *Nature* 403: 901–906.
26. Le Quesne J, Jones J, Warren J, Dawson SJ, Ali R, et al. (2012) Biological and prognostic associations of miR-205 and let-7b in breast cancer revealed by in situ hybridisation analysis of micro-RNA expression in arrays of archival tumour tissue. *J Pathol*.
27. Li Y, VandenBoom TG, 2nd, Kong D, Wang Z, Ali S, et al. (2009) Up-regulation of miR-200 and let-7 by natural agents leads to the reversal of epithelial-to-mesenchymal transition in gemcitabine-resistant pancreatic cancer cells. *Cancer Res* 69: 6704–6712.
28. Motoyama K, Inoue H, Nakamura Y, Uetake H, Sugihara K, et al. (2008) Clinical significance of high mobility group A2 in human gastric cancer and its relationship to let-7 microRNA family. *Clin Cancer Res* 14: 2334–2340.
29. Zhao Y, Deng C, Lu W, Xiao J, Ma D, et al. (2011) Let-7 microRNAs Induce Tamoxifen Sensitivity by Down-Regulation of Estrogen Receptor Alpha Signaling in Breast Cancer. *Mol Med*.
30. Zhao Y, Deng C, Wang J, Xiao J, Gatalica Z, et al. (2011) Let-7 family miRNAs regulate estrogen receptor alpha signaling in estrogen receptor positive breast cancer. *Breast Cancer Res Treat* 127: 69–80.
31. Buffa FM, Camps C, Winchester L, Snell CE, Gee HE, et al. (2011) microRNA-associated progression pathways and potential therapeutic targets identified by integrated mRNA and microRNA expression profiling in breast cancer. *Cancer Res* 71: 5635–5645.
32. Wang CM, Wang Y, Fan CG, Xu FF, Sun WS, et al. (2011) miR-29c targets TNFAIP3, inhibits cell proliferation and induces apoptosis in hepatitis B virus-related hepatocellular carcinoma. *Biochem Biophys Res Commun* 411: 586–592.
33. Vendrell JA, Ghayad S, Ben-Larbi S, Dumontet C, Mechti N, et al. (2007) A20/TNFAIP3, a new estrogen-regulated gene that confers tamoxifen resistance in breast cancer cells. *Oncogene* 26: 4656–4667.
34. Gao W, Shen H, Liu L, Xu J, Shu Y (2011) MiR-21 overexpression in human primary squamous cell lung carcinoma is associated with poor patient prognosis. *J Cancer Res Clin Oncol* 137: 557–566.
35. Sengupta S, den Boon JA, Chen IH, Newton MA, Stanhope SA, et al. (2008) MicroRNA 29c is down-regulated in nasopharyngeal carcinomas, up-regulating mRNAs encoding extracellular matrix proteins. *Proc Natl Acad Sci U S A* 105: 5874–5878.
36. Yan LX, Huang XF, Shao Q, Huang MY, Deng L, et al. (2008) MicroRNA miR-21 overexpression in human breast cancer is associated with advanced clinical stage, lymph node metastasis and patient poor prognosis. *RNA* 14: 2348–2360.
37. Yoshimoto N, Toyama T, Takahashi S, Sugiura H, Endo Y, et al. (2011) Distinct expressions of microRNAs that directly target estrogen receptor alpha in human breast cancer. *Breast Cancer Res Treat* 130: 331–339.
38. Leivonen SK, Makela R, Ostling P, Kohonen P, Haapa-Paananen S, et al. (2009) Protein lysate microarray analysis to identify microRNAs regulating estrogen receptor signaling in breast cancer cell lines. *Oncogene* 28: 3926–3936.
39. Wang YX, Zhang XY, Zhang BF, Yang CQ, Chen XM, et al. (2010) Initial study of microRNA expression profiles of colonic cancer without lymph node metastasis. *J Dig Dis* 11: 50–54.
40. Yao Y, Suo AL, Li ZF, Liu LY, Tian T, et al. (2009) MicroRNA profiling of human gastric cancer. *Mol Med Report* 2: 963–970.
41. Cai K, Wang Y, Bao X (2011) MiR-106b promotes cell proliferation via targeting RB in laryngeal carcinoma. *J Exp Clin Cancer Res* 30: 73.
42. Ivanovska I, Ball AS, Diaz RL, Magnus JF, Kibukawa M, et al. (2008) MicroRNAs in the miR-106b family regulate p21/CDKN1A and promote cell cycle progression. *Mol Cell Biol* 28: 2167–2174.
43. Kim K, Chadalapaka G, Lee SO, Yamada D, Sastre-Garau X, et al. (2012) Identification of oncogenic microRNA-17–92/ZBTB4/specificity protein axis in breast cancer. *Oncogene* 31: 1034–1044.
44. Hu S, Dong TS, Dalal SR, Wu F, Bissonnette M, et al. (2011) The microbe-derived short chain fatty acid butyrate targets miRNA-dependent p21 gene expression in human colon cancer. *PLoS One* 6: e16221.
45. Kim YK, Kim VN (2007) Processing of intronic microRNAs. *EMBO J* 26: 775–783.
46. Petrocca F, Visone R, Onelli MR, Shah MH, Nicoloso MS, et al. (2008) E2F1-regulated microRNAs impair TGFbeta-dependent cell-cycle arrest and apoptosis in gastric cancer. *Cancer Cell* 13: 272–286.
47. Zhang H, Zuo Z, Lu X, Wang L, Wang H, et al. (2012) MiR-25 regulates apoptosis by targeting Bim in human ovarian cancer. *Oncol Rep* 27: 594–598.
48. Kan T, Sato F, Ito T, Matsumura N, David S, et al. (2009) The miR-106b-25 polycistron, activated by genomic amplification, functions as an oncogene by suppressing p21 and Bim. *Gastroenterology* 136: 1689–1700.
49. Ramesh S, Wildey GM, Howe PH (2009) Transforming growth factor beta (TGFbeta)-induced apoptosis: the rise & fall of Bim. *Cell Cycle* 8: 11–17.
50. Thomson JM, Newman M, Parker JS, Morin-Kensicki EM, Wright T, et al. (2006) Extensive post-transcriptional regulation of microRNAs and its implications for cancer. *Genes Dev* 20: 2202–2207.
51. Yamamoto Y, Yoshioka Y, Minoura K, Takahashi RU, Takeshita F, et al. (2011) An integrative genomic analysis revealed the relevance of microRNA and gene expression for drug-resistance in human breast cancer cells. *Mol Cancer* 10: 135.
52. Verduci L, Simili M, Rizzo M, Mercatanti A, Evangelista M, et al. (2010) MicroRNA (miRNA)-mediated interaction between leukemia/lymphoma-related factor (LRF) and alternative splicing factor/splicing factor 2 (ASF/SP2) affects mouse embryonic fibroblast senescence and apoptosis. *J Biol Chem* 285: 39551–39563.
53. Zhu M, Yi M, Kim CH, Deng C, Li Y, et al. (2011) Integrated miRNA and mRNA expression profiling of mouse mammary tumor models identifies miRNA signatures associated with mammary tumor lineage. *Genome Biol* 12: R77.
54. Dai X, Chiang Y, Wang Z, Song Y, Lu C, et al. (2012) Expression levels of microRNA-375 in colorectal carcinoma. *Mol Med Report* 5: 1299–1304.
55. Wang F, Li Y, Zhou J, Xu J, Peng C, et al. (2011) miR-375 is down-regulated in squamous cervical cancer and inhibits cell migration and invasion via targeting transcription factor SP1. *Am J Pathol* 179: 2580–2588.
56. Li X, Lin R, Li J (2011) Epigenetic silencing of microRNA-375 regulates PDK1 expression in esophageal cancer. *Dig Dis Sci* 56: 2849–2856.
57. Ward A, Balwierz A, Zhang JD, Kublbeck M, Pawitan Y, et al. (2012) Re-expression of microRNA-375 reverses both tamoxifen resistance and accompanying EMT-like properties in breast cancer. *Oncogene*.
58. de Souza Rocha Simonini P, Breiling A, Gupta N, Malekpour M, Youns M, et al. (2010) Epigenetically deregulated microRNA-375 is involved in a positive feedback loop with estrogen receptor alpha in breast cancer cells. *Cancer Res* 70: 9175–9184.
59. Zhou X, Marian C, Makambi KH, Kost O, Kallakury BV, et al. (2012) MicroRNA-9 as potential biomarker for breast cancer local recurrence and tumor estrogen receptor status. *PLoS One* 7: e39011.
60. Papadopoulos GL, Alexiou P, Maragkakis M, Reczko M, Hatzigeorgiou AG (2009) DIANA-mirPath: Integrating human and mouse microRNAs in pathways. *Bioinformatics* 25: 1991–1993.
